# Supplementary material for: Differential impact on motility and biofilm dispersal of closely related phosphodiesterases in Pseudomonas aeruginosa
Source: PubMed Central journal article supplement (PMC7148300; doi:10.1038/s41598-020-63008-5), 2020-04-10
Supplement: 41598_2020_63008_MOESM1_ESM.pdf [file 41598_2020_63008_MOESM1_ESM.pdf]

**Supplement to:**

**Differential impact on motility and biofilm dispersal of closely related phosphodiesterases in *Pseudomonas aeruginosa***

**Yu-ming Cai<sup>a,b</sup>, Andrew Hutchin<sup>b,c,\*</sup>, Jack Craddock<sup>a,b</sup>, Martin A. Walsh<sup>c,d</sup>, Jeremy S. Webb<sup>a,b</sup> and Ivo Tews<sup>a,b</sup>**

<sup>a</sup> National Biofilms Innovation Centre, University of Southampton, Southampton, SO17 1BJ, UK

<sup>b</sup> Biological Sciences, Institute for Life Sciences, University of Southampton, Southampton, SO17 1BJ, UK

<sup>c</sup> Diamond Light Source, Harwell Science and Innovation Campus, Didcot, Oxfordshire, OX11 0DE, UK

<sup>d</sup> Research Complex at Harwell, Harwell Science and Innovation Campus, Didcot, Oxfordshire, OX11 0FA, UK

\* Present Address: Structure and Function of Biological Membranes Lab, Université Libre de Bruxelles, Boulevard du Triomphe, 1050 Bruxelles, Belgium

Address correspondence to Ivo Tews, [ivo.tews@soton.ac.uk](mailto:ivo.tews@soton.ac.uk)

JSW and IT are last authors on this work

**Table S1: Bacterial strains and plasmids**

| Strains and plasmids                                           | Genotype or phenotypes <sup>a</sup>                                                                                                                     | Reference                |
|----------------------------------------------------------------|---------------------------------------------------------------------------------------------------------------------------------------------------------|--------------------------|
| <b><i>E. coli</i></b>                                          |                                                                                                                                                         |                          |
| S17-1( $\lambda$ pir)                                          | <i>TpR SmR recA, thi, pro, hsdR-M+RP4; 2-Tc:Mu: Km Tn7</i>                                                                                              | Biomedal corp.           |
| DH5 $\alpha$                                                   | <i>spuE44 <math>\Delta</math>lacU169(<math>\phi</math>80lacZ<math>\Delta</math>M15) hsdR17 <math>\lambda</math>pir recA1 endA1 gyrA96 thi-1 relA1</i>   | Lab collection           |
| <b><i>P. aeruginosa</i></b>                                    |                                                                                                                                                         |                          |
| PAO1                                                           | Wild-Type, C.Manoil lab, University of Washington                                                                                                       | 57                       |
| <b>KO mutants</b>                                              |                                                                                                                                                         |                          |
| $\Delta$ pa0285                                                | PAO1 mutant ( <i>pa0285::aacCl</i> ); Gm <sup>R</sup>                                                                                                   | This study               |
| $\Delta$ pa0290                                                | PAO1 mutant ( <i>pa0290::aacCl</i> ); Gm <sup>R</sup>                                                                                                   | This study               |
| $\Delta$ pa0338                                                | PAO1 mutant ( <i>pa0338::aacCl</i> ); Gm <sup>R</sup>                                                                                                   | This study               |
| $\Delta$ pa0575                                                | PAO1 mutant ( <i>pa0575::aacCl</i> ); Gm <sup>R</sup>                                                                                                   | This study               |
| $\Delta$ pa0847                                                | PAO1 mutant ( <i>pa0847::aacCl</i> ); Gm <sup>R</sup>                                                                                                   | This study               |
| $\Delta$ pa0861 ( $\Delta$ rbdA)                               | PAO1 mutant ( <i>pa0861::aacCl</i> ); Gm <sup>R</sup>                                                                                                   | This study               |
| $\Delta$ pa1181 ( $\Delta$ yegeE)                              | PAO1 mutant ( <i>pa1181::aacCl</i> ); Gm <sup>R</sup>                                                                                                   | This study               |
| $\Delta$ pa2072                                                | PAO1 mutant ( <i>pa2072::aacCl</i> ); Gm <sup>R</sup>                                                                                                   | This study               |
| $\Delta$ pa4601 ( $\Delta$ morA)                               | PAO1 mutant ( <i>pa4601::aacCl</i> ); Gm <sup>R</sup>                                                                                                   | This study               |
| $\Delta$ pa4959 ( $\Delta$ fimX)                               | PAO1 mutant ( <i>pa4959::aacCl</i> ); Gm <sup>R</sup>                                                                                                   | This study               |
| $\Delta$ pa5017 ( $\Delta$ dipA)                               | PAO1 mutant ( <i>pa5017::aacCl</i> ); Gm <sup>R</sup>                                                                                                   | This study               |
| $\Delta$ pa5442                                                | PAO1 mutant ( <i>pa5442::aacCl</i> ); Gm <sup>R</sup>                                                                                                   | This study               |
| $\Delta$ pa1443 ( $\Delta$ fliM)                               | PAO1 mutant ( <i>pa4959::aacCl</i> ); Gm <sup>R</sup>                                                                                                   | This study               |
| $\Delta$ pa4525 ( $\Delta$ pilA)                               | PAO1 mutant ( <i>pa5017::aacCl</i> ); Gm <sup>R</sup>                                                                                                   | This study               |
| $\Delta$ pa1443 $\Delta$ pa4525 ( $\Delta$ pilA $\Delta$ fliM) | PAO1 mutant ( <i>pa1443::aacCl,pa4525::Neo</i> ); Gm <sup>R</sup> ; Km <sup>R</sup>                                                                     | This study               |
| <b>KO mutants with c-di-GMP reporter gfp vector</b>            |                                                                                                                                                         |                          |
| PAO1 Tn7CdrA::gfp                                              | PAO1 WT with mini-Tn7-P <sub>cdrA</sub> -RBSII-gfp(Mut3)-T <sub>0</sub> -T <sub>1</sub> ;Tet <sup>R</sup>                                               | This study               |
| $\Delta$ pa0285 Tn7CdrA::gfp                                   | PAO1 mutant ( <i>pa0285::aacCl</i> ) with mini-Tn7-P <sub>cdrA</sub> -RBSII-gfp(Mut3)-T <sub>0</sub> -T <sub>1</sub> ;Gm <sup>R</sup> ;Tet <sup>R</sup> | This study               |
| $\Delta$ pa0290 Tn7CdrA::gfp                                   | PAO1 mutant ( <i>pa0290::aacCl</i> ) with mini-Tn7-P <sub>cdrA</sub> -RBSII-gfp(Mut3)-T <sub>0</sub> -T <sub>1</sub> ;Gm <sup>R</sup> ;Tet <sup>R</sup> | This study               |
| $\Delta$ pa0338 Tn7CdrA::gfp                                   | PAO1 mutant ( <i>pa0338::aacCl</i> ) with mini-Tn7-P <sub>cdrA</sub> -RBSII-gfp(Mut3)-T <sub>0</sub> -T <sub>1</sub> ;Gm <sup>R</sup> ;Tet <sup>R</sup> | This study               |
| $\Delta$ pa0575 Tn7CdrA::gfp                                   | PAO1 mutant ( <i>pa0575::aacCl</i> ) with mini-Tn7-P <sub>cdrA</sub> -RBSII-gfp(Mut3)-T <sub>0</sub> -T <sub>1</sub> ;Gm <sup>R</sup> ;Tet <sup>R</sup> | This study               |
| $\Delta$ pa0847 Tn7CdrA::gfp                                   | PAO1 mutant ( <i>pa0847::aacCl</i> ) with mini-Tn7-P <sub>cdrA</sub> -RBSII-gfp(Mut3)-T <sub>0</sub> -T <sub>1</sub> ;Gm <sup>R</sup> ;Tet <sup>R</sup> | This study               |
| $\Delta$ pa0861 Tn7CdrA::gfp                                   | PAO1 mutant ( <i>pa0861::aacCl</i> ) with mini-Tn7-P <sub>cdrA</sub> -RBSII-gfp(Mut3)-T <sub>0</sub> -T <sub>1</sub> ;Gm <sup>R</sup> ;Tet <sup>R</sup> | This study               |
| $\Delta$ pa1181 Tn7CdrA::gfp                                   | PAO1 mutant ( <i>pa1181::aacCl</i> ) with mini-Tn7-P <sub>cdrA</sub> -RBSII-gfp(Mut3)-T <sub>0</sub> -T <sub>1</sub> ;Gm <sup>R</sup> ;Tet <sup>R</sup> | This study               |
| $\Delta$ pa2072 Tn7CdrA::gfp                                   | PAO1 mutant ( <i>pa2072::aacCl</i> ) with mini-Tn7-P <sub>cdrA</sub> -RBSII-gfp(Mut3)-T <sub>0</sub> -T <sub>1</sub> ;Gm <sup>R</sup> ;Tet <sup>R</sup> | This study               |
| $\Delta$ pa4601 Tn7CdrA::gfp                                   | PAO1 mutant ( <i>pa4601::aacCl</i> ) with mini-Tn7-P <sub>cdrA</sub> -RBSII-gfp(Mut3)-T <sub>0</sub> -T <sub>1</sub> ;Gm <sup>R</sup> ;Tet <sup>R</sup> | This study               |
| $\Delta$ pa4959 Tn7CdrA::gfp                                   | PAO1 mutant ( <i>pa4959::aacCl</i> ) with mini-Tn7-P <sub>cdrA</sub> -RBSII-gfp(Mut3)-T <sub>0</sub> -T <sub>1</sub> ;Gm <sup>R</sup> ;Tet <sup>R</sup> | This study               |
| $\Delta$ pa5017 Tn7CdrA::gfp                                   | PAO1 mutant ( <i>pa5017::aacCl</i> ) with mini-Tn7-P <sub>cdrA</sub> -RBSII-gfp(Mut3)-T <sub>0</sub> -T <sub>1</sub> ;Gm <sup>R</sup> ;Tet <sup>R</sup> | This study               |
| $\Delta$ pa5442 Tn7CdrA::gfp                                   | PAO1 mutant ( <i>pa5442::aacCl</i> ) with mini-Tn7-P <sub>cdrA</sub> -RBSII-gfp(Mut3)-T <sub>0</sub> -T <sub>1</sub> ;Gm <sup>R</sup> ;Tet <sup>R</sup> | This study               |
| <b>Plasmids</b>                                                |                                                                                                                                                         |                          |
| pPS856                                                         | Ap <sup>R</sup> , Gm <sup>R</sup> ; 0.83-kb blunt-ended SacI fragment from pUCGM                                                                        | 37                       |
| pEX100T                                                        | Ap <sup>R</sup> ; oriT <sup>+</sup> sacB <sup>+</sup> gene replacement vector                                                                           | 37                       |
| pCdrA::gfp                                                     | pUCP22Not-P <sub>cdrA</sub> -RBSII-gfp(Mut3)-T <sub>0</sub> -T <sub>1</sub> , Amp <sup>R</sup> Tet <sup>R</sup>                                         | 41                       |
| pCR <sup>TM</sup> 4-TOPO <sup>TM</sup>                         | Km <sup>R</sup> and Amp <sup>R</sup> TOPO cloning expression vector                                                                                     | Invitrogen <sup>TM</sup> |

**Table S2: Primer sequences**

| Primer                                              | Sequence (5'→3')                        |
|-----------------------------------------------------|-----------------------------------------|
| <b>Used for KO mutant generation and sequencing</b> |                                         |
| <i>Δpa0285</i>                                      |                                         |
| PA0285-up-F                                         | ATG <u>CCCCGGG</u> CCTGACCGACAATCTCGAC  |
| PA0285-up-R                                         | ATGCG <u>AATTC</u> GTTCCAGATCTCTCCGCTC  |
| PA0285-dn-F                                         | ATGCA <u>AGCTT</u> AGTCACCGAAAGCGCGG    |
| PA0285-dn-R                                         | ATG <u>CCCCGGG</u> TCAGTCTTCCGGCAGCG    |
| SeqPA0285-F                                         | GTAAGTCCACCAGTTGC                       |
| SeqPA0285-R                                         | CCATCCAGGCTTCTGAG                       |
| <i>Δpa0290</i>                                      |                                         |
| PA0290-up-F                                         | ATG <u>CCCCGGG</u> GCGAATGGTCTACGTCAGC  |
| PA0290-up-R                                         | ATGCG <u>AATTC</u> CAGGAACGCCAACGGTATC  |
| PA0290-dn-F                                         | ATGCA <u>AGCTT</u> GCGACCTGTTCGGGC      |
| PA0290-dn-R                                         | ATG <u>CCCCGGG</u> TCAGCCCACGACGATG     |
| SeqPA0290-F                                         | GTATCGCTCGCAACTG                        |
| SeqPA0290-R                                         | CCTTCTGGCGAGTTACC                       |
| <i>Δpa0338</i>                                      |                                         |
| PA0338-up-F                                         | ATG <u>CCCCGGG</u> GTGCGGCGCTTACGC      |
| PA0338-up-R                                         | ATGCG <u>AATTC</u> CTCGGGATGGATGATGC    |
| PA0338-dn-F                                         | ATGCA <u>AGCTT</u> CCTGTTCGGCCACTCC     |
| PA0338-dn-R                                         | ATG <u>CCCCGGG</u> TCAGCAACAGGCCACG     |
| SeqPA0338-F                                         | CAAGGTGAAGTGGCTGC                       |
| SeqPA0338-R                                         | CTCCAGCGTGTTCATCG                       |
| <i>Δpa0575</i>                                      |                                         |
| PA0575-up-F                                         | ATG <u>CCCCGGG</u> GATCATCATCCTGGCACG   |
| PA0575-up-R                                         | ATGCG <u>AATTC</u> GGACGATGGGAAGACCG    |
| PA0575-dn-F                                         | ATGCA <u>AGCTT</u> GCCGAGGATTGCGG       |
| PA0575-dn-R                                         | ATG <u>CCCCGGG</u> CACCGTGAGCTGCATG     |
| SeqPA0575-F                                         | GACGAGTGACGAACGAAC                      |
| SeqPA0575-R                                         | GTTGCCATCAGATAAGGAC                     |
| <i>Δpa0847</i>                                      |                                         |
| PA0847-up-F                                         | ATG <u>CCCCGGG</u> CCGTCGCCGAGGAC       |
| PA0847-up-R                                         | ATGCG <u>AATTC</u> GTCGTAGCTGGCATCCC    |
| PA0847-dn-F                                         | ATGCA <u>AGCTT</u> CGCGCCATGCAGAG       |
| PA0847-dn-R                                         | ATG <u>CCCCGGG</u> CGCCAGGCGGTAG        |
| SeqPA0847-F                                         | GGAACTTATCCATGCGGTTG                    |
| SeqPA0847-R                                         | GTGGCTGAACTGCTGCATC                     |
| <i>Δpa0861</i>                                      |                                         |
| PA0861-up-F                                         | ATG <u>CCCCGGG</u> ATGAGGCAGAACCGGACTC  |
| PA0861-up-R                                         | ATGCG <u>AATTC</u> AGCTCGATGGCGCG       |
| PA0861-dn-F                                         | ATGCA <u>AGCTT</u> GGTTGCCAACCTGGCC     |
| PA0861-dn-R                                         | ATG <u>CCCCGGG</u> CTACCGGAGGTTCTGTCCC  |
| SeqPA0861-F                                         | CAGCCACTAGACTCCTACTG                    |
| SeqPA0861-R                                         | CAGTCGACGATCAGTTGC                      |
| <i>Δpa1181</i>                                      |                                         |
| PA1181-up-F                                         | ATG <u>CCCCGGG</u> TTCGCGTGCTCTGGG      |
| PA1181-up-R                                         | ATGCG <u>AATTC</u> AGGCCATCGGCAGGTAC    |
| PA1181-dn-F                                         | ATGCA <u>AGCTT</u> CTTTCGAGCTGACCGAGACG |
| PA1181-dn-R                                         | ATG <u>CCCCGGG</u> TCAGCCCAACTCCTGGC    |
| SeqPA1181-F                                         | CTGAGCCTGGACGATTC                       |
| SeqPA1181-R                                         | CTGCACATGAGTTTCGACG                     |

---

*Δpa2072*  
PA2072-up-F ATGCCCCGGGATGCTTGCTTCAGCGATTG  
PA2072-up-R ATGCGAATTCTCGACGAAGACCATCACC  
PA2072-dn-F ATGCAAGCTTAGGCGAGGTGATGGTCTC  
PA2072-dn-R ATGCCCCGGGTGAGCAGGAACCCCTTGC  
SeqPA2072-F ATGAAGGTCGAGGTGGTG  
SeqPA2072-R TGACGCCTCGTTGTTATTGC

*Δpa4601*  
PA4601-up-F ATGCCCCGGGTTGCGGACTCTACGACAG  
PA4601-up-R ATGCGAATTCAACTCGCTACGGGTCTCG  
PA4601-dn-F ATGCAAGCTTATCCTGATGAGTGACGTCCG  
PA4601-dn-R ATGCCCCGGGTCAGCCCTCGTTGAACATG  
SeqPA4601-F GACAAAAGTGCCTCGAC  
SeqPA4601-R GTCAAATCACGGCTGAAC

*Δpa4959*  
PA4959-up-F ATGCCCCGGGCACGTACGACGGCGAAC  
PA4959-up-R ATGCGAATTCGTTCTGACTTTCCTCAGCAG  
PA4959-dn-F ATGCAAGCTTGAGGTGCTCCTGCGC  
PA4959-dn-R ATGCCCCGGGGGTCTGGACGAAGGAG  
SeqPA4959-F GTTCGAATACCGCTCG  
SeqPA4959-R TGGACGGCATCCTCTAC

*Δpa5017*  
PA5017-up-F ATGCCCCGGGCGACTACCCTCTGCGC  
PA5017-up-R ATGCGAATTCGTGCCGTAGGCTTCGC  
PA5017-dn-F ATGCAAGCTTGCCGATCGGCAAGTG  
PA5017-dn-R ATGCCCCGGGCCATGGCGATCACCG  
SeqPA5017-F CAATCGGCATAATGCACC  
SeqPA5017-R CAGAACCATGGCTCTCG

*Δpa5442*  
PA5442-up-F ATGCCCCGGGATGACCGTCCATGTTCGAG  
PA5442-up-R ATGCGAATTCCGAACACCAGCACCTGC  
PA5442-dn-F ATGCAAGCTTCGGCGCAACTGGAGC  
PA5442-dn-R ATGCCCCGGGTCAACGAGCCTGGCG  
SeqPA5442-F GTCGTTGAGGGAGTTTCAG  
SeqPA5442-R GACCAATCGGGATAGCAG

*Δpa1443*  
PA1443-up-F ATGCCCCGGGAGCAAGCTGAAGCTGATC  
PA1443-up-R ATGCGAATTCTTTCATCCTGGGAAAGCAG  
PA1443-dn-F ATGCAAGCTTTACAGATTCTCGAAGCGG  
PA1443-dn-R ATGCCCCGGGAGCTTCTTGATGCGTTTCG  
SeqPA1443-F AGCAAGCTGAAGCTGATC  
SeqPA1443-R AGCTTCTTGATGCGTTTCG

*Δpa4525*  
PA4525-up-F ATGCCCCGGGTTGTCCAGGCTATTCAGG  
PA4525-up-R ATGCGAATTCACCACGATCATCAGTTTCGATC  
PA4525-dn-F ATGCAAGCTTTACCTTTACCTTCAGACTG  
PA4525-dn-R ATGCCCCGGGTGACCAAGGATGTCAGG  
SeqPA4525-F TTGTCCAGGCTATTCAGG  
SeqPA4525-R TGACCAAGGATGTCAGG

Gentamicin resistance and kanamycin resistance gene cassettes  
Gm-F ATGCGAATTCGAATTGACATAAGCCTGTTCCGG  
Gm-R ATGCAAGCTTGAATTGGCCGCGG  
Km-F ATGCGAATTCAATGTCAGCTACTGGGCTATC  
Km-R ATGCAAGCTTCTGATGCGGTGTGAAATAC

---

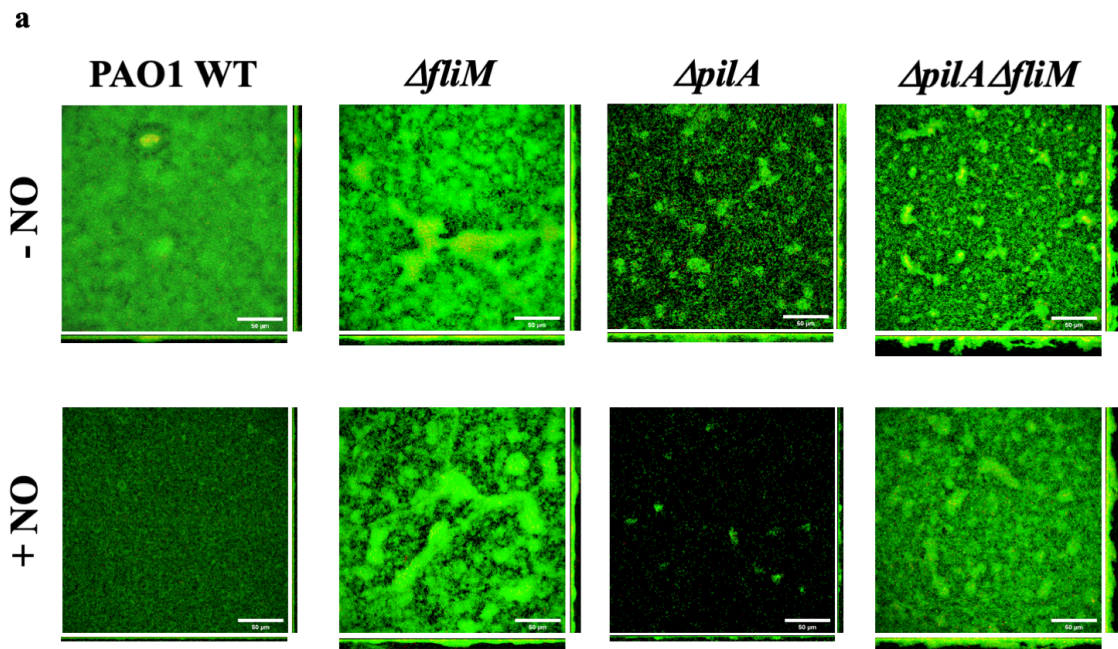

**b** **NO-induced biofilm dispersal**

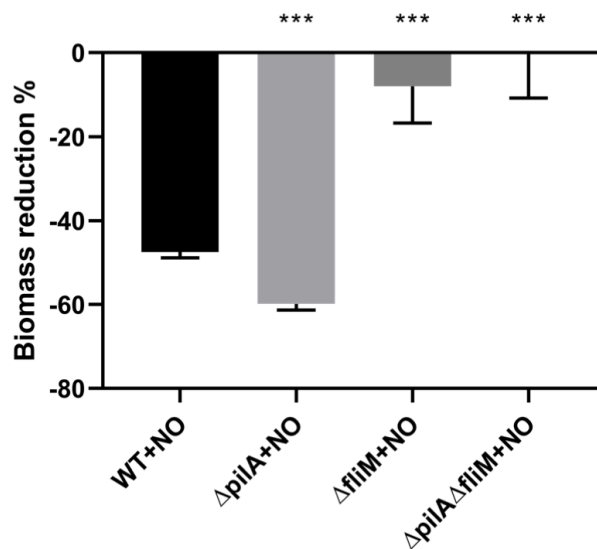

**Figure S1. NO-induced biofilm dispersal of flagellum and pili deletion mutants. (A)** Confocal laser scanning microscopy images used for phenotypic analysis of 72 hrs mature biofilms before or after 2 hrs treatment with 250  $\mu$ M SNP for the flagellum mutant  $\Delta$ *fliM*, the pili mutant  $\Delta$ *pilA* and the double mutant  $\Delta$ *pilA* $\Delta$ *fliM* compared with PAO1 WT (scale bar 50  $\mu$ m). **(B)** COMSTAT analysis of biomass reduction after treatment normalised against WT, highlighting differences in biomass reduction for the mutants. The Student's T-test was used to determine significances, where \*\*\* denotes a confidence level of  $p < 0.01$ , and \*\* denotes a confidence level of  $0.01 < p < 0.05$ . Data acquired from 3 independent experiments.
